# Supplementary material
Source: PubMed Central journal article supplement (PMC7612606)
Supplement: EMS144102-supplement-Supplementary_Tables.pdf [file EMS144102-supplement-Supplementary_Tables.pdf]

**Supplementary Table 1. Differences in HP CNV and rs2000999 genotype CROMIS versus ALSPAC, genotype frequency**

|        | Hp1-1               | Hp2-1               | Hp2-2               | Total       | p-value overall |
|--------|---------------------|---------------------|---------------------|-------------|-----------------|
| CROMIS | 151<br>17.9%        | 413<br>49%          | 279<br>33.1%        | 843<br>100% | 0.01            |
| ALSPAC | 137<br>14.8%        | 418<br>45.1%        | 372<br>40.1%        | 927<br>100% |                 |
|        | <b>rs2000999 AA</b> | <b>rs2000999 AG</b> | <b>rs2000999 GG</b> |             |                 |
| CROMIS | 29<br>3.5%          | 267<br>32.6%        | 523<br>63.9%        | 843<br>100% | 0.47            |
| ALSPAC | 34<br>4.6%          | 229<br>30.6%        | 485<br>64.8%        | 748<br>100% |                 |

**Supplementary Table 2. Univariable analysis for functional outcome and death**

| Variable                     | Unfavourable outcome |            |         | Death     |           |         |
|------------------------------|----------------------|------------|---------|-----------|-----------|---------|
|                              | OR                   | 95% CI     | p-value | OR        | 95% CI    | p-value |
| Age, years                   | 1.05                 | 1.03-1.06  | <0.001  | 1.1       | 1.07-1.13 | <0.001  |
| Female Sex                   | 2.3                  | 1.69-3.14  | <0.001  | 1.69      | 1.13-2.53 | 0.01    |
| Ethnicity                    |                      |            | 0.71    |           |           |         |
| - White                      | Reference            |            |         | Reference |           | 0.89    |
| - Asian                      | 1.3                  | 0.66-2.58  |         | 0.74      | 0.22-2.53 |         |
| - Black                      | 1.16                 | 0.5-2.66   |         | 0.99      | 0.4-2.43  |         |
| Smoker                       | 0.83                 | 0.61-1.12  | 0.21    | 1.2       | 0.79-1.8  | 0.39    |
| Hypertension                 | 1.79                 | 1.31-2.45  | <0.001  | 1.23      | 0.79-1.9  | 0.36    |
| SBP on admission, mmHg       | 1                    | 0.99-1.002 | 0.33    | 0.99      | 0.99-1    | 0.15    |
| DM                           | 1.48                 | 0.98-2.26  | 0.06    | 1.5       | 0.91-2.48 | 0.11    |
| Anti-hypertensive medication | 1.45                 | 1.07-1.97  | 0.02    | 1.76      | 1.17-2.65 | 0.01    |
| Anticoagulation              | 1.41                 | 1.03-1.94  | 0.03    | 1.78      | 1.18-2.68 | 0.006   |
| Antiplatelets                | 1.33                 | 0.93-1.89  | 0.11    | 1.04      | 0.65-1.66 | 0.86    |
| Hypercholesterolaemia        | 1.57                 | 1.15-2.14  | 0.004   | 1.09      | 0.72-1.66 | 0.67    |
| GCS admission                |                      |            |         |           |           |         |
| - GCS 3-8                    | 4.41                 | 1.52-12.78 | 0.006   | 5.51      | 2.6-11.64 | <0.001  |
| - GCS 9-15                   | Reference            |            |         | Reference |           |         |

|                          |           |           |                  |           |           |                  |
|--------------------------|-----------|-----------|------------------|-----------|-----------|------------------|
| ICH location             |           |           | 0.63             |           |           |                  |
| - Cerebellar             | Reference |           |                  | Reference |           | <b>0.1</b>       |
| - Brainstem              | 1.35      | 0.4-4.55  |                  | 0.34      | 0.04-3.08 |                  |
| - Deep                   | 0.77      | 0.39-1.52 |                  | 0.82      | 0.33-2.07 |                  |
| - Lobar                  | 0.84      | 0.42-1.68 |                  | 1.36      | 0.54-3.39 |                  |
| crICH volume, mL         | 1.61      | 1.35-1.93 | <b>&lt;0.001</b> | 1.88      | 1.52-2.34 | <b>&lt;0.001</b> |
| IV extension             | 2.38      | 1.64-3.45 | <b>&lt;0.001</b> | 2.62      | 1.72-4    | <b>&lt;0.001</b> |
| crPHO volume, mL         | 1.39      | 1.17-1.66 | <b>&lt;0.001</b> | 1.82      | 1.44-2.29 | <b>&lt;0.001</b> |
| OED, cm                  | 1.32      | 0.68-2.54 | 0.41             | 2.76      | 1.23-6.17 | <b>0.01</b>      |
| Neurosurgery             | 2.99      | 1-8.94    | <b>0.05</b>      | 1.23      | 0.41-3.72 | 0.71             |
| <i>HP</i> CNV            |           |           | 0.63             |           |           | <b>0.15</b>      |
| - 1-1                    | Reference |           |                  | Reference |           |                  |
| - 2-1                    | 0.82      | 0.54-1.24 |                  | 0.65      | 0.37-1.12 |                  |
| - 2-2                    | 0.84      | 0.54-1.3  |                  | 0.96      | 0.55-1.65 |                  |
| <i>HP</i> CNV 1 vs all 2 | 0.83      | 0.56-1.22 | 0.34             | 1.29      | 0.85-1.95 | 0.23             |
| <i>HP</i> CNV all 1 vs 2 | 0.93      | 0.71-1.33 | 0.86             | 0.77      | 0.47-1.27 | 0.31             |
| <i>HP</i> SNP            |           |           | 0.95             |           |           | 0.49             |
| - A:A                    | Reference |           |                  | Reference |           |                  |
| - A:G                    | 0.88      | 0.38-2    |                  | 0.91      | 0.32-2.54 |                  |
| - G:G                    | 0.9       | 0.4-2.02  |                  | 0.71      | 0.26-1.96 |                  |

Cm = centimetre; CNV = copy number variation; crICH = cube root intracerebral haemorrhage; crPHO = cube root perihematoma oedema; DM = diabetes mellitus; GCS = Glasgow Coma Scale; *HP* = Haptoglobin; ICH = intracerebral haemorrhage; IV = intraventricular; ml = millilitre; mmHg = millimetre of mercury; OED = oedema extension distance; OR = Odds Ratio; SNP = single nucleotide polymorphism; y = year

**Supplementary Table 3. Factors associated with 6 months mortality after ICH in an adjusted multivariable logistic regression model, *HP* CNV dichotomized**

|                           | <b>OR</b> | <b>95% CI</b> | <b>P value</b> |
|---------------------------|-----------|---------------|----------------|
| Age (years)               | 1.11      | 1.07-1.14     | <0.001         |
| Female Sex                | 1.15      | 0.69-1.94     | 0.6            |
| Hypertension              | 0.98      | 0.56-1.72     | 0.95           |
| Diabetes mellitus         | 1.33      | 0.65-2.69     | 0.43           |
| Oral anticoagulation      | 1.27      | 0.75-2.13     | 0.37           |
| GCS on admission (binary) | 4.37      | 1.39-13.73    | 0.01           |
| - GCS 3-8                 |           |               |                |
| - GCS 9-15 (reference)    |           |               |                |
| ICH location              |           |               |                |

|                                                           |                 |           |        |
|-----------------------------------------------------------|-----------------|-----------|--------|
| - Cerebellar (reference)                                  |                 |           | 0.39   |
| - Brainstem                                               | No observations |           |        |
| - Deep                                                    | 0.94            | 0.32-2.8  |        |
| - Lobar                                                   | 0.62            | 0.2-1.93  |        |
| Cr ICH volume (mL)                                        | 1.99            | 1.45-2.74 | <0.001 |
| OED (cm)                                                  | 3               | 1.07-8.39 | 0.04   |
| IV extension                                              | 1.57            | 0.9-2.75  | 0.11   |
| <i>HP CNV</i>                                             |                 |           |        |
| - <i>HP1</i> allele ( <i>HP1</i> -1/2-1 vs <i>HP2</i> -2) | 0.55            | 0.31-0.95 | 0.03   |
| Rs2000999                                                 |                 |           |        |
| - A:A (reference)                                         |                 |           | 0.77   |
| - A:G                                                     | 0.61            | 0.16-2.4  |        |
| - G:G                                                     | 0.61            | 0.16-2.41 |        |

Cm = centimetre; CNV = copy number variation, Cr = cube root; CT = computed tomography; GCS = Glasgow Coma Scale; *HP* = Haptoglobin; ICH = intracerebral haemorrhage; IV = intraventricular; OAC = oral anticoagulation; SBP = systolic blood pressure

**Supplementary Table 4. Univariable analysis for ICH and OED volume**

| Variable                                | ICH volume  |               |                  | OED volume  |                |                  |
|-----------------------------------------|-------------|---------------|------------------|-------------|----------------|------------------|
|                                         | Coefficient | 95% CI        | p-value          | Coefficient | 95% CI         | p-value          |
| Time event to CT                        |             |               | 0.5              |             |                | 0.13             |
| - Day 1                                 | Reference   |               |                  |             |                |                  |
| - Day 2                                 | 0.18        | -0.12-0.48    |                  | 0.07        | 0.001-0.15     |                  |
| - Day 3                                 | -0.17       | -0.61-0.27    |                  | 0.03        | -0.09-0.15     |                  |
| Age, years                              | 0.004       | -0.002-0.01   | <b>0.2</b>       | 0.001       | -0.001-0.002   | 0.25             |
| Female Sex                              | 0.05        | -0.1-0.2      | 0.52             | 0.02        | -0.01-0.06     | <b>0.19</b>      |
| Smoker                                  | -0.03       | -0.11-0.04    | 0.39             | -0.008      | -0.03-0.01     | 0.4              |
| Hypertension                            | 0.06        | -0.1-0.22     | 0.45             | -0.005      | -0.04-0.03     | 0.77             |
| SBP on admission, mmHg                  | -0.002      | -0.004-0.0005 | <b>0.12</b>      | 0.0003      | -0.0005-0.0007 | 0.66             |
| Anti-hypertensive medication            | 0.08        | -0.07-0.23    | 0.29             | -0.07       | -0.1-0.03      | <b>&lt;0.001</b> |
| Anticoagulation                         | 0.09        | -0.06-0.25    | 0.25             | -0.05       | -0.09-(-0.01)  | <b>0.01</b>      |
| Antiplatelets                           | 0.01        | -0.16-0.18    | 0.89             | -0.03       | -0.07-0.02     | 0.21             |
| High cholesterol                        | 0.16        | 0.01-0.32     | <b>0.03</b>      | -0.006      | -0.04-0.03     | 0.74             |
| Platelet level, x10 <sup>9</sup> /liter | 0.001       | -0.0002-0.002 | <b>0.13</b>      | 0.0003      | 0.0001-0.001   | <b>0.002</b>     |
| ICH location                            |             |               | <b>&lt;0.001</b> |             |                | <b>&lt;0.001</b> |

|                            |           |               |                  |        |            |             |
|----------------------------|-----------|---------------|------------------|--------|------------|-------------|
| - Cerebellar               | Reference |               |                  |        |            |             |
| - Brainstem                | -0.86     | -1.34-(-0.37) |                  | -0.09  | -0.21-0.04 |             |
| - Deep                     | -0.19     | -0.49-0.11    |                  | 0.15   | 0.07-0.23  |             |
| - Lobar                    | 0.67      | 0.37-0.97     |                  | 0.23   | 0.15-0.31  |             |
| IV extension               | 0.46      | 0.29-0.62     | <b>&lt;0.001</b> | -0.03  | -0.07-0.01 | <b>0.16</b> |
| Neurosurgery               | 0.62      | 0.15-1.09     | <b>0.01</b>      | -0.003 | -0.12-0.12 | 0.95        |
| <i>HP</i> CNV              |           |               | 0.35             |        |            | 0.84        |
| - 1-1                      | Reference |               |                  |        |            |             |
| - 2-1                      | 0.11      | -0.09-0.34    |                  | 0.004  | -0.05-0.06 |             |
| - 2-2                      | 0.02      | -0.2-0.24     |                  | -0.01  | -0.06-0.05 |             |
| <i>HP</i> CNV all 1 vs 2-2 | -0.07     | -0.22-0.09    | 0.39             | -0.01  | -0.05-0.03 | 0.57        |
| <i>HP</i> CNV all 2 vs 1-1 | 0.08      | -0.12-0.28    | 0.42             | -0.001 | -0.05-0.05 | 0.96        |
| HP SNP                     |           |               | 0.82             |        |            | 0.98        |
| - A:A                      | Reference |               |                  |        |            |             |
| - A:G                      | 0.03      | -0.39-0.45    |                  | -0.002 | -0.1-0.1   |             |
| - G:G                      | 0.08      | -0.33-0.49    |                  | -0.005 | -0.11-0.1  |             |

CNV = copy number variation; *HP* = Haptoglobin; ICH = intracerebral haemorrhage; IV = intraventricular; OED = oedema extension distance; SBP = systolic blood pressure; SNP = single nucleotide polymorphism
